# Supplementary material
Source: PubMed Central journal article supplement (PMC8110475)
Supplement: 41372_2021_1019_MOESM4_ESM.pdf [file 41372_2021_1019_MOESM4_ESM.pdf]

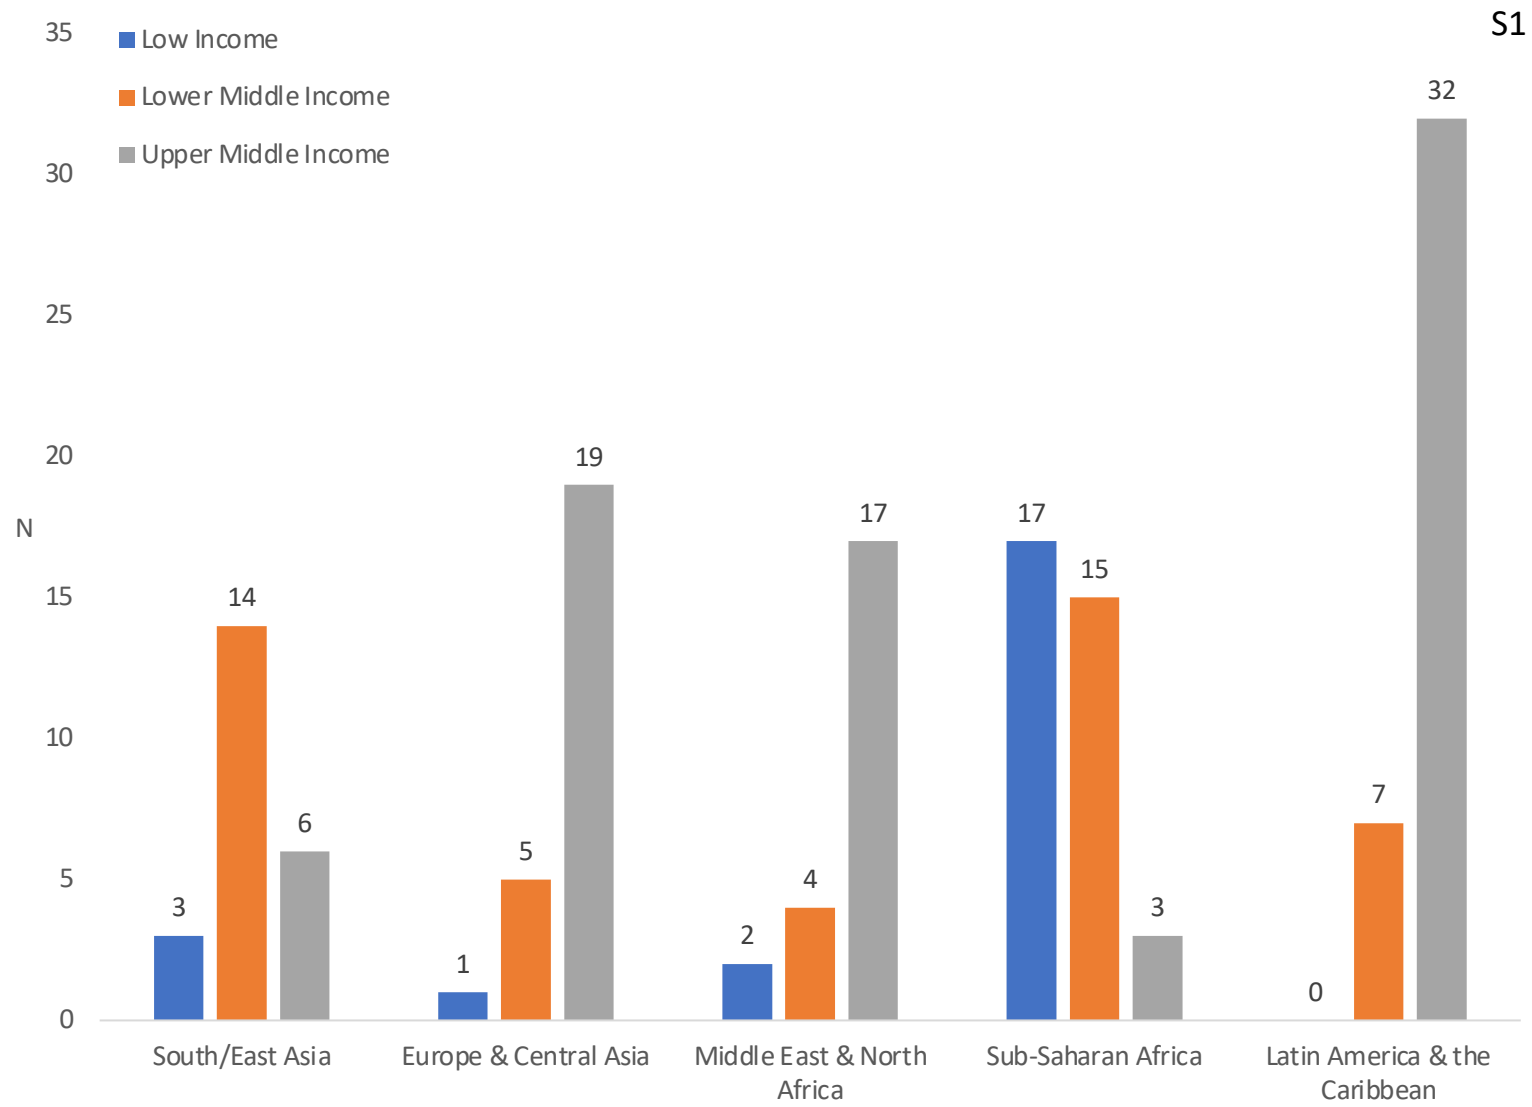

Classification of 145 responses by income level of countries in the five global regions
