# Supplementary material
Source: PubMed Central journal article supplement (PMC8110475)

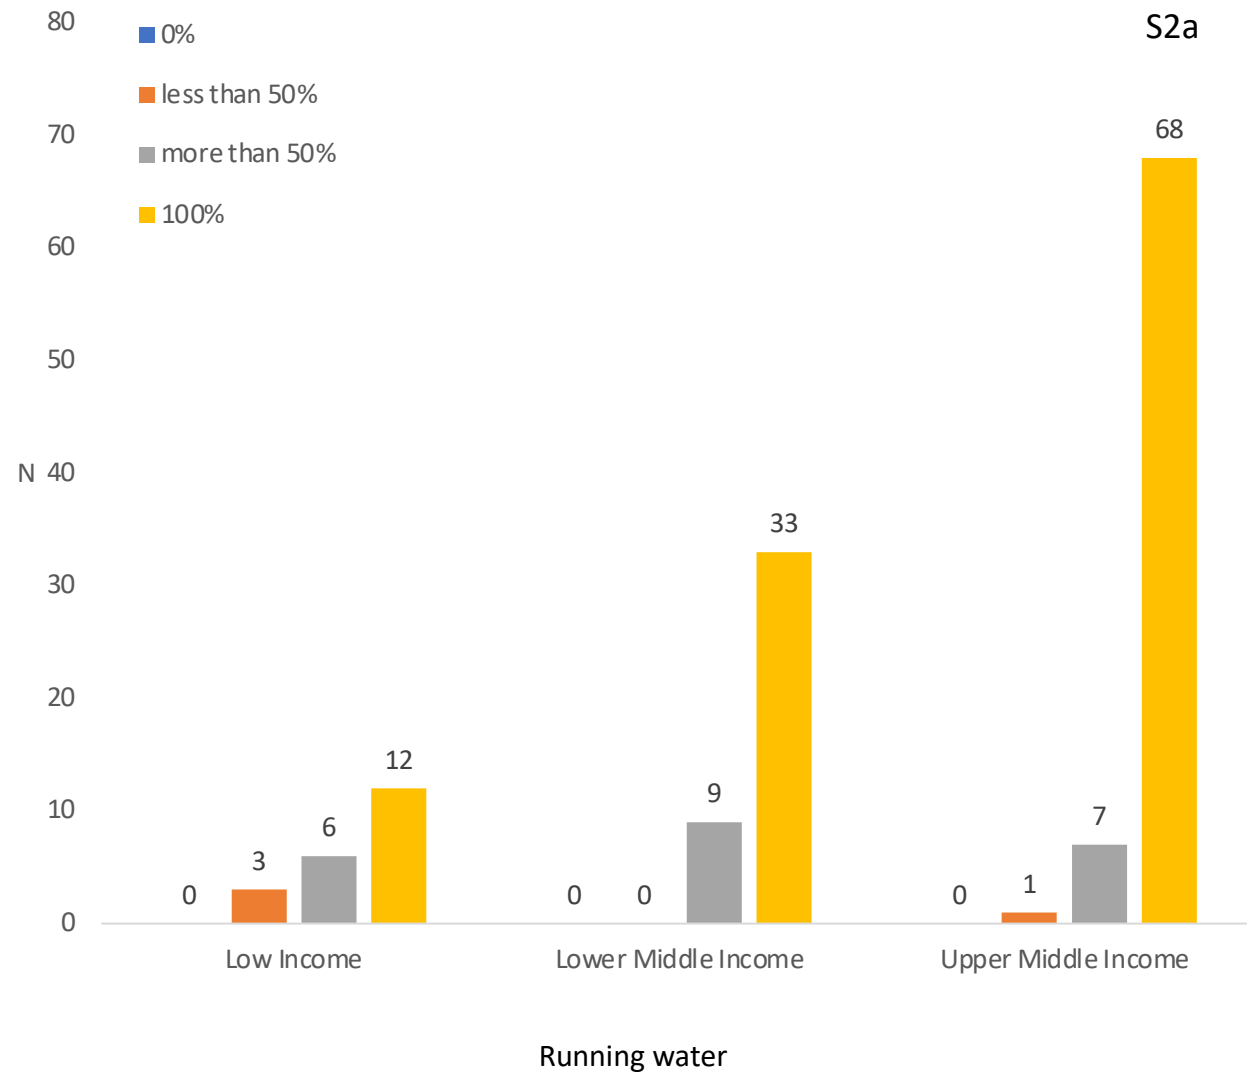

Supplement: 41372_2021_1019_MOESM5_ESM.pdf [file 41372_2021_1019_MOESM5_ESM.pdf]
