# Supplementary material
Source: PubMed Central journal article supplement (PMC8110475)
Supplement: 41372_2021_1019_MOESM12_ESM.pdf [file 41372_2021_1019_MOESM12_ESM.pdf]

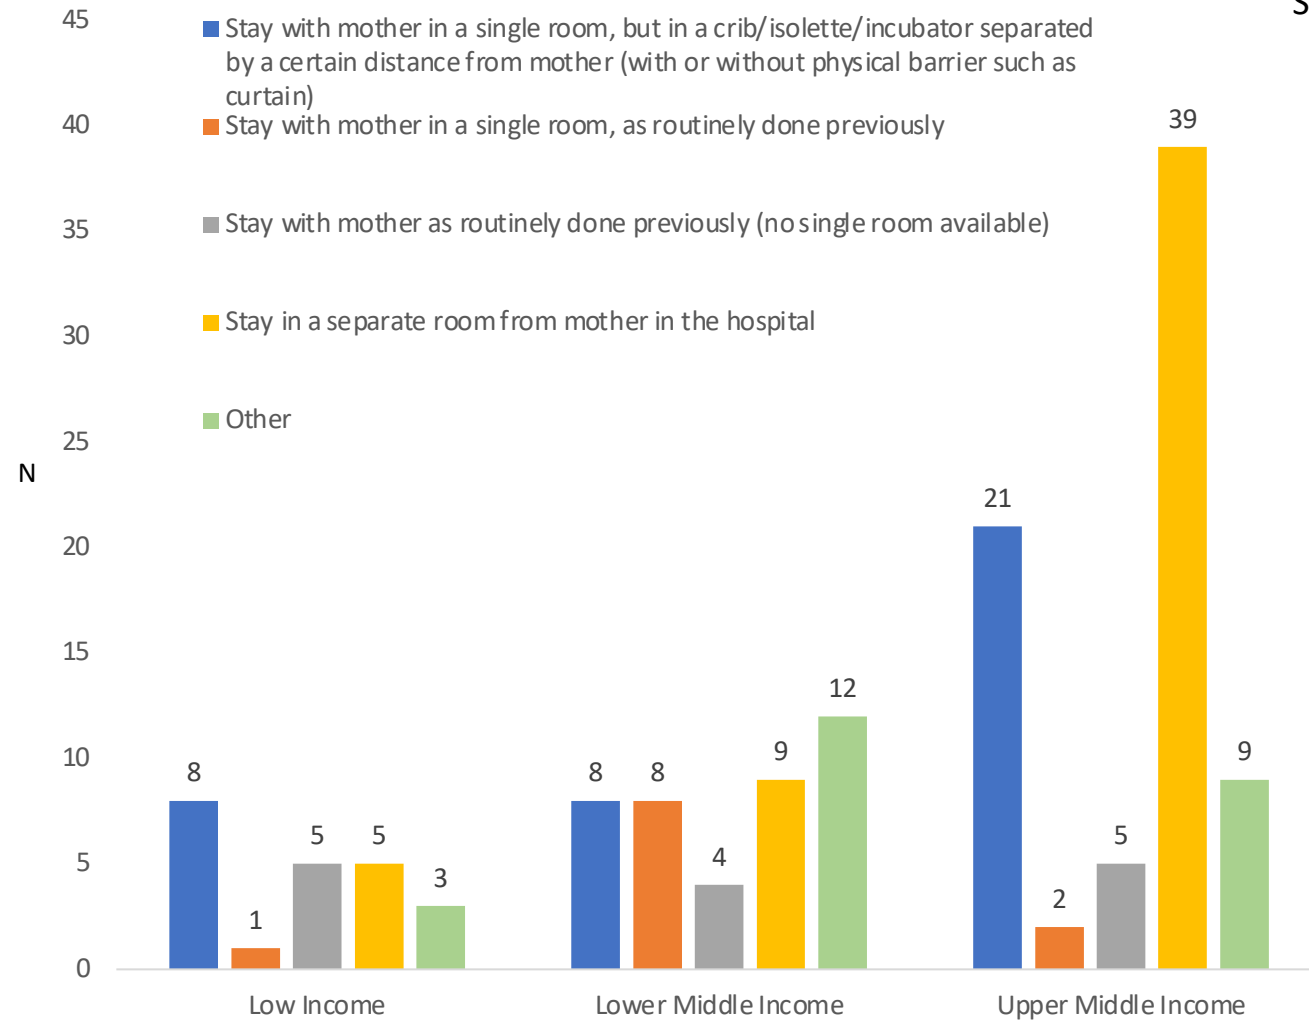

Where do you care for the asymptomatic infant born to a mother with COVID-19 initially after birth?
