# Supplementary material
Source: PubMed Central journal article supplement (PMC8110475)
Supplement: 41372_2021_1019_MOESM13_ESM.pdf [file 41372_2021_1019_MOESM13_ESM.pdf]

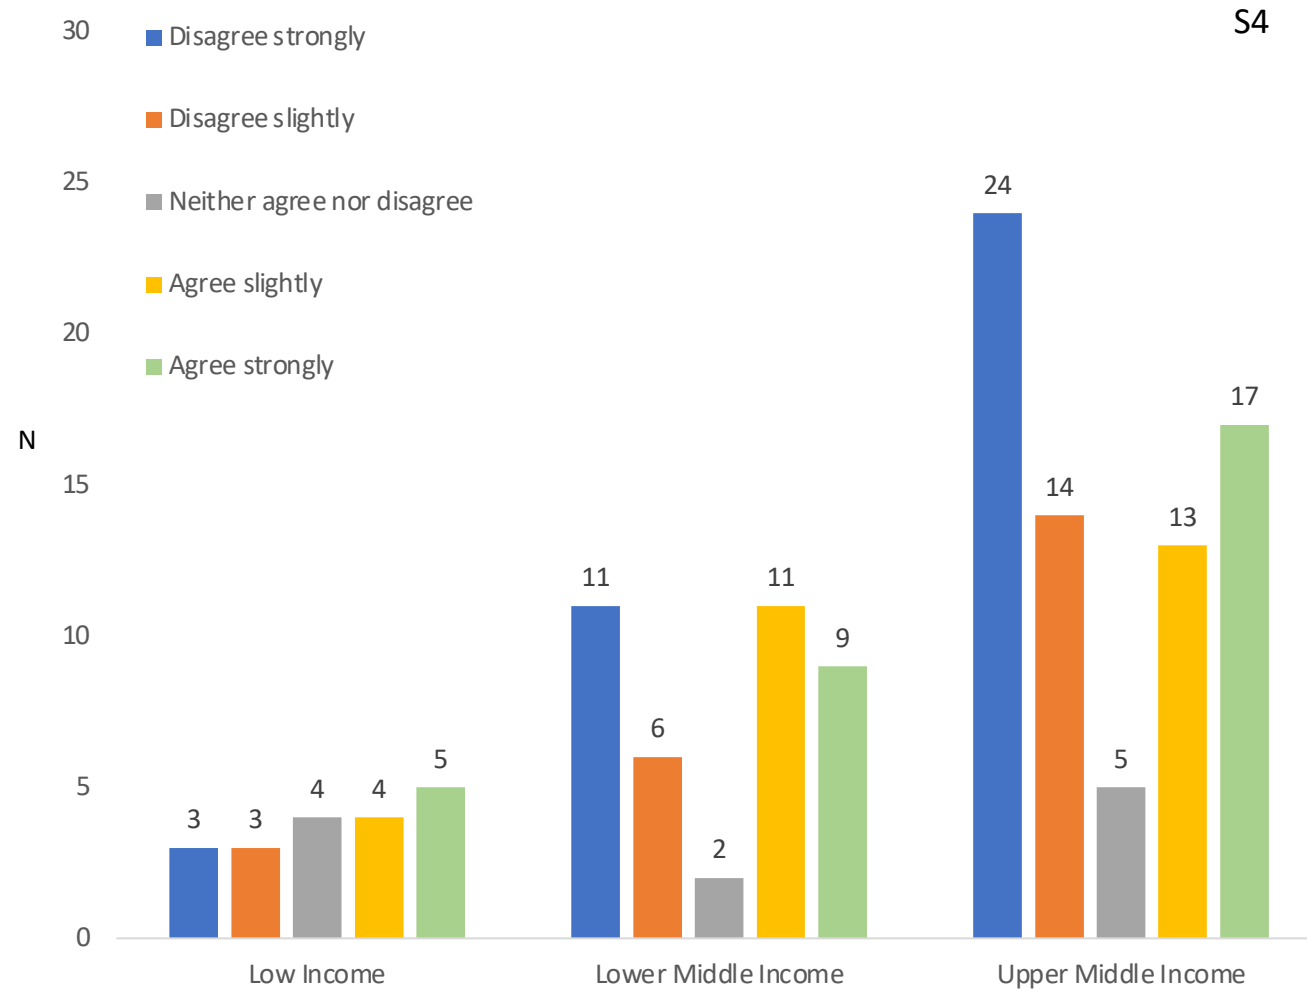

For the asymptomatic infant born to a mother with COVID-19: In our maternity/neonatal unit, we follow mother's/family's wishes regarding whether their infant will stay with mother after birth.
