# Supplementary material
Source: PubMed Central journal article supplement (PMC8110475)
Supplement: 41372_2021_1019_MOESM14_ESM.pdf [file 41372_2021_1019_MOESM14_ESM.pdf]

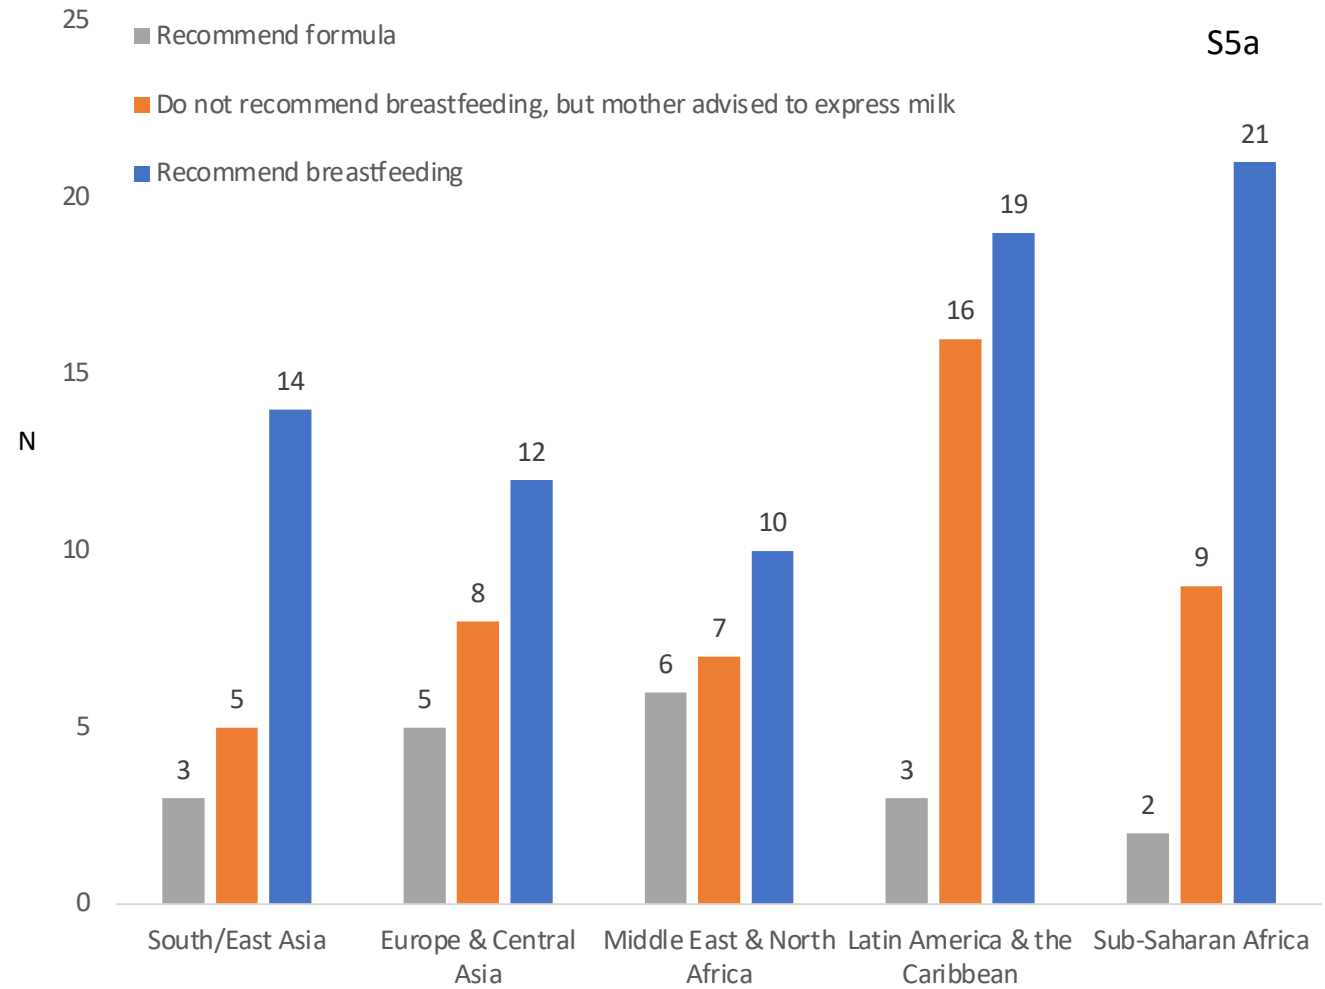

Feeding of asymptomatic infants born to SARS-CoV-2 positive or suspected positive mothers presented by region
